# Supplementary material for: Sperm Vitality and Necrozoospermia: Diagnosis, Management, and Results of a Global Survey of Clinical Practice
Source: PubMed Central journal article supplement — World J Mens Health. 2021 Oct 13;40(2):228–42. doi: 10.5534/wjmh.210149 (PMC8987132; doi:10.5534/wjmh.210149), 2021-10-13
Supplement: wjmh-40-228-s001.pdf [file wjmh-40-228-s001.pdf]

Supplement File 1.

|                                                                                                                                                                                                                           |                                                     |                                                                                                                                                                                 |      |      |                                                                                                  |       |                                             |                                                                                                      |                                                                                     |                        |
|---------------------------------------------------------------------------------------------------------------------------------------------------------------------------------------------------------------------------|-----------------------------------------------------|---------------------------------------------------------------------------------------------------------------------------------------------------------------------------------|------|------|--------------------------------------------------------------------------------------------------|-------|---------------------------------------------|------------------------------------------------------------------------------------------------------|-------------------------------------------------------------------------------------|------------------------|
|  <b>COLLEGE of AMERICAN PATHOLOGISTS</b><br><small>325 Waukegan Road, Northfield, Illinois 60093-2750<br/>800-323-4040 • cap.org</small> |                                                     | <b>CAP Number:</b> 1650514-01 <b>Kit#</b> 1<br><b>Institution:</b> Cleveland Clinic<br><b>Attention:</b> Sajal Gupta MD,TS(ABB)<br><b>City / State:</b> Cleveland OH 44106-3018 |      |      | <b>Kit ID:</b> 34613141<br><b>Kit Mailed:</b> 4/19/2021<br><b>Original Evaluation:</b> 5/28/2021 |       |                                             |                                                                                                      |                                                                                     |                        |
| <b>EVALUATION ORIGINAL</b>                                                                                                                                                                                                |                                                     | <b>SEM-A 2021 Semen Analysis</b>                                                                                                                                                |      |      |                                                                                                  |       |                                             |                                                                                                      |                                                                                     |                        |
| Test<br>Unit of Measure<br>Peer Group                                                                                                                                                                                     | <b>Evaluation and Comparative Method Statistics</b> |                                                                                                                                                                                 |      |      |                                                                                                  |       |                                             | <b>Plot of the Relative Distance of Your Results from Target as Percentages of allowed Deviation</b> |                                                                                     |                        |
|                                                                                                                                                                                                                           | Specimen                                            | Your Result                                                                                                                                                                     | Mean | S.D. | No. of Labs                                                                                      | S.D.I | Limits of Acceptability<br>Lower      Upper | Your Grade                                                                                           | Survey                                                                              | -100-----Mean-----+100 |
| Sperm viability                                                                                                                                                                                                           | SEM-03                                              | 52                                                                                                                                                                              | 30.0 | 23.9 | 359                                                                                              | +0.9  | 0      102                                  | Acceptable                                                                                           |  |                        |
| %<br>Sperm Viability (% Viable)                                                                                                                                                                                           | SEM-04                                              | 15                                                                                                                                                                              | 26.1 | 25.4 | 359                                                                                              | -0.4  | 0      103                                  | Acceptable                                                                                           |                                                                                     |                        |
| The College of American Pathologists recommends that the result of this interlaboratory comparison not be used as a sole criterion for judging the performance of any individual clinical laboratory.                     |                                                     |                                                                                                                                                                                 |      |      |                                                                                                  |       |                                             |                                                                                                      |                                                                                     |                        |
