# Supplementary material for: Sperm Vitality and Necrozoospermia: Diagnosis, Management, and Results of a Global Survey of Clinical Practice
Source: PubMed Central journal article supplement — World J Mens Health. 2021 Oct 13;40(2):228–42. doi: 10.5534/wjmh.210149 (PMC8987132; doi:10.5534/wjmh.210149), 2021-10-13
Supplement: wjmh-40-228-s002.pdf [file wjmh-40-228-s002.pdf]

Supplement File 2.

7/22/2021

Diagnostic Use of Extended Semen Testing - Survey of the Reproductive Specialists

## Diagnostic Use of Extended Semen Testing - Survey of the Reproductive Specialists

### Demographic data

1. Email address:\*

2. In which country do you currently practice?\*

3. What is your age (years)?\*

4. What is the nature of your employment?

- Attending physician
- Fellow
- Resident
- Advanced Practice Provider (PA/NP)
- Urologist
- Andrologist
- Uro-Andrologist
- Other, please specify

5. Which of the following best describes your primary practice setting? Mark all that apply\*

- Private practice or clinic
- Academic hospital or clinic
- Non-academic private hospital or clinic
- Public hospital or clinic
- Non-teaching community hospital
- Other, please specify

6. How long have you been practicing as a clinician?\*

7. Is this your first time participating in this survey?\*

7/22/2021

Diagnostic Use of Extended Semen Testing - Survey of the Reproductive Specialists

## Diagnostic Use of Extended Semen Testing - Survey of the Reproductive Specialists

### Sperm Vitality

19. Do you recommend sperm vitality testing in your clinical practice in patients with male infertility?\*

-- Please Select -- ▼

## Diagnostic Use of Extended Semen Testing - Survey of the Reproductive Specialists

### Sperm Vitality

20. When do you test for sperm vitality?\*

-- Please Select -- ▼

21. Which stain do you use for sperm vitality?\*

- Toluidine blue
- Eosin-nigrosin
- Other, please specify

22. Do you use sperm vitality as a surrogate marker of sperm DNA fragmentation test?\*

-- Please Select -- ▼

23. How often do you order this test?\*

- Weekly
- Monthly
- Yearly

24. How many tests do you order in a month?\*

- <10
- 10-50
- >50

25. How do you evaluate patients with abnormal vitality? (mark all that apply)\*

- Testing for oxidative stress
- Genetic testing
- Semen culture for infections
- Testing for sperm DNA fragmentation
- Other, please specify

26. How do you manage patients with necrozoospermia (vitality=0%)? (mark all that apply)\*

7/22/2021

Diagnostic Use of Extended Semen Testing - Survey of the Reproductive Specialists

- Frequent ejaculation
- Surgical sperm retrieval with ICSI
- Other, please specify

27. Does your lab conduct this test automatically (no doctor's order required) when the sperm motility is <40%?\*

-- Please Select -- ▼
