# Supplementary material for: Sperm Vitality and Necrozoospermia: Diagnosis, Management, and Results of a Global Survey of Clinical Practice
Source: PubMed Central journal article supplement — World J Mens Health. 2021 Oct 13;40(2):228–42. doi: 10.5534/wjmh.210149 (PMC8987132; doi:10.5534/wjmh.210149), 2021-10-13
Supplement: wjmh-40-228-s003.pdf [file wjmh-40-228-s003.pdf]

**Supplement File 3.** Country of origin of participants in the survey

| Country of origin      | Number of responders (n) | Percentage |
|------------------------|--------------------------|------------|
| United States          | 10                       | 15.4       |
| Japan                  | 8                        | 12.3       |
| Italy                  | 7                        | 10.8       |
| Turkey                 | 4                        | 6.2        |
| Indonesia              | 3                        | 4.6        |
| Korea                  | 3                        | 4.6        |
| Egypt                  | 2                        | 3.1        |
| India                  | 2                        | 3.1        |
| Qatar                  | 2                        | 3.1        |
| Spain                  | 2                        | 3.1        |
| Vietnam                | 2                        | 3.1        |
| Argentina              | 1                        | 1.5        |
| Australia              | 1                        | 1.5        |
| Austria                | 1                        | 1.5        |
| Brazil                 | 1                        | 1.5        |
| Canada                 | 1                        | 1.5        |
| Emirate                | 1                        | 1.5        |
| France                 | 1                        | 1.5        |
| Greece                 | 1                        | 1.5        |
| Hong Kong              | 1                        | 1.5        |
| Kuwait                 | 1                        | 1.5        |
| Malaysia               | 1                        | 1.5        |
| Nigeria                | 1                        | 1.5        |
| Oman                   | 1                        | 1.5        |
| Pakistan               | 1                        | 1.5        |
| Philippines            | 1                        | 1.5        |
| Serbia                 | 1                        | 1.5        |
| Switzerland            | 1                        | 1.5        |
| Tunisia                | 1                        | 1.5        |
| United Arabic Emirates | 1                        | 1.5        |
| Zambia                 | 1                        | 1.5        |
